# Supplementary material for: Entropy and Multifractal-Multiscale Indices of Heart Rate Time Series to Evaluate Intricate Cognitive-Autonomic Interactions
Source: MDPI journal article supplement (doi:10.3390/e23060663), 2021-05-25
Supplement: s1 [file s1]

# Supplementary Materials

**Table 1.** Task effect on HRV indices (standard statistics and Bayesian equivalents are reported).

| Statistic test        | Features |                |                 |          |                |                 |                |                |                 |          |                |                 |
|-----------------------|----------|----------------|-----------------|----------|----------------|-----------------|----------------|----------------|-----------------|----------|----------------|-----------------|
|                       | meanRR*  |                |                 | RMSSD*   |                |                 | LF*            |                |                 | HF*      |                |                 |
|                       | <i>F</i> | <i>p.value</i> | $\log(BF_{10})$ | <i>F</i> | <i>p.value</i> | $\log(BF_{10})$ | <i>F</i>       | <i>p.value</i> | $\log(BF_{10})$ | <i>F</i> | <i>p.value</i> | $\log(BF_{10})$ |
| <b>ANOVA</b>          | 0.96     | <0.001         | 2.33            | 0.93     | 0.75           | -1.52           | 0.64           | 0.26           | 1.60            | 0.83     | 0.29           | -0.93           |
| <b>Post-hoc tests</b> |          |                |                 |          |                |                 |                |                |                 |          |                |                 |
| <b>baseline/SCWT</b>  | 3.89     | <0.001         | 1.28            | 0.61     | 1.00           | -1.47           | 0.52           | 1              | 0.52            | 1.73     | 0.516          | 0.06            |
| <b>baseline/SST</b>   | 0.75     | 0.98           | -1.50           | 0.47     | 1.00           | -1.09           | 0              | 1              | -1.12           | 0.75     | 1              | -1.66           |
| <b>baseline/GNGT</b>  | 0.98     | 0.98           | -0.97           | 0.14     | 1.00           | -1.33           | 1.73           | 0.516          | 1.71            | 0.14     | 1              | -1.65           |
| <b>SCWT / SST</b>     | 3.14     | <0.05          | 2.74            | 1.08     | 1.00           | -0.33           | 0.52           | 1              | -0.88           | 0.98     | 1              | -0.39           |
| <b>SCWT / GNGT</b>    | 2.91     | <0.05          | 1.98            | 0.75     | 1.00           | 0.08            | 1.22           | 0.904          | -0.85           | 1.59     | 0.571          | 0.22            |
| <b>SST / GNGT</b>     | 0.23     | 0.98           | -1.52           | 0.33     | 1.00           | -1.64           | 1.73           | 0.516          | 0.99            | 0.61     | 1              | -1.69           |
| Statistic test        | LF/HF*   |                |                 | MFI*     |                |                 | E <sub>i</sub> |                |                 |          |                |                 |
|                       | <i>F</i> | <i>p.value</i> | $\log(BF_{10})$ | <i>F</i> | <i>p.value</i> | $\log(BF_{10})$ | <i>F</i>       | <i>p.value</i> | $\log(BF_{10})$ |          |                |                 |
|                       | <i>F</i> | <i>p.value</i> | $\log(BF_{10})$ | <i>F</i> | <i>p.value</i> | $\log(BF_{10})$ | <i>F</i>       | <i>p.value</i> | $\log(BF_{10})$ |          |                |                 |
| <b>ANOVA</b>          | 0.72     | 0.16           | -2.02           | 0.46     | <0.01          | 2.14            | 4.67           | <0.01          | 2.19            |          |                |                 |
| <b>Post-hoc tests</b> |          |                |                 |          |                |                 |                |                |                 |          |                |                 |
| <b>baseline/SCWT</b>  | 1.92     | 0.35           | -1.18           | 0.61     | 0.86           | -1.63           | -3.56          | <0.01          | 2.76            |          |                |                 |
| <b>baseline/SST</b>   | 1.50     | 0.57           | -1.69           | 2.44     | 0.08           | 1.03            | -0.87          | 0.81           | -1.41           |          |                |                 |
| <b>baseline/GNGT</b>  | 0.33     | 1              | -1.69           | 0.80     | 0.86           | -0.40           | -1.11          | 0.81           | -1.24           |          |                |                 |
| <b>SCWT / SST</b>     | 0.42     | 1              | -0.79           | 1.83     | 0.28           | 0.08            | 2.69           | <0.05          | 2.29            |          |                |                 |
| <b>SCWT / GNGT</b>    | 1.59     | 0.57           | -0.42           | 1.41     | 0.49           | -0.20           | 2.45           | 0.06           | 1.43            |          |                |                 |
| <b>SST / GNGT</b>     | 1.17     | 0.73           | -1.69           | 3.23     | <0.01          | 3.46            | -0.24          | 0.81           | -1.66           |          |                |                 |

meanRR = mean interbeat interval duration; RMSSD = root mean square of successive difference; LF = low frequency power in HRV power spectrum; HF = high frequencies power in HRV power spectrum; LF/HF = ratio of low frequencies on high frequencies; E<sub>i</sub> = entropy index; MFI = multifractal index. SCWT = Stroop color and word task; GNGT = go/no-go task; SST = stop signal task. \* Indicates that distribution of feature values violated at least one parametric test assumption. In that case, nonparametric tests were conducted.

**Table 2.** - Interpretation scale of log (BF<sub>10</sub>) factor based on Jeffreys 1961.

|                                                | Log (BF <sub>10</sub> ) | Interpretation                          | Symbol              |
|------------------------------------------------|-------------------------|-----------------------------------------|---------------------|
| Growing evidence<br>in favor of H <sub>1</sub> | > 2                     | extreme evidence for H <sub>1</sub>     | H <sub>1</sub> **** |
|                                                | [1.48 ; 2]              | very strong evidence for H <sub>1</sub> | H <sub>1</sub> ***  |
|                                                | [1 ; 1.48]              | strong evidence for H <sub>1</sub>      | H <sub>1</sub> **   |
|                                                | [0.48 ; 1]              | moderate evidence for H <sub>1</sub>    | H <sub>1</sub> *    |
|                                                | [0 ; 0.48]              | anecdotal evidence for H <sub>1</sub>   | ns                  |
|                                                | 0                       | no evidence                             | ns                  |
| Growing evidence<br>in favor of H <sub>0</sub> | [-0.48 ; 0]             | anecdotal evidence for H <sub>0</sub>   | ns                  |
|                                                | [-1 ; -0.48]            | moderate evidence for H <sub>0</sub>    | H <sub>0</sub> *    |
|                                                | [-1.48 ; -1]            | strong evidence for H <sub>0</sub>      | H <sub>0</sub> **   |
|                                                | [-2 ; -1.48]            | very strong evidence for H <sub>0</sub> | H <sub>0</sub> ***  |
|                                                | < -2                    | extreme evidence for H <sub>0</sub>     | H <sub>0</sub> **** |

BF<sub>10</sub> = bayes factor; ns = non-significant; H<sub>0</sub> = null hypothesis; H<sub>1</sub> = alternative hypothesis. Interpretation scale: \*\*\*\*, \*\*\*, \*\* and \* mean respectively, extreme, very strong, strong and moderate evidence for the null or the alternative one.

#### Supplementary reference:

Jeffreys, H. *Theory of Probability*, 3rd ed.; Oxford University Press: Oxford, United Kingdom, 1961.
